# Supplementary material for: Carbon flux responses to seasonal and annual hydroclimatic variability in a tropical dry forest in South Ecuador
Source: Copernicus journal article supplement (doi:10.5194/egusphere-2026-222), 2026-01-22
Supplement: Supplementary file [file egusphere-2026-222-AC2-supplement.pdf]

Supplementary

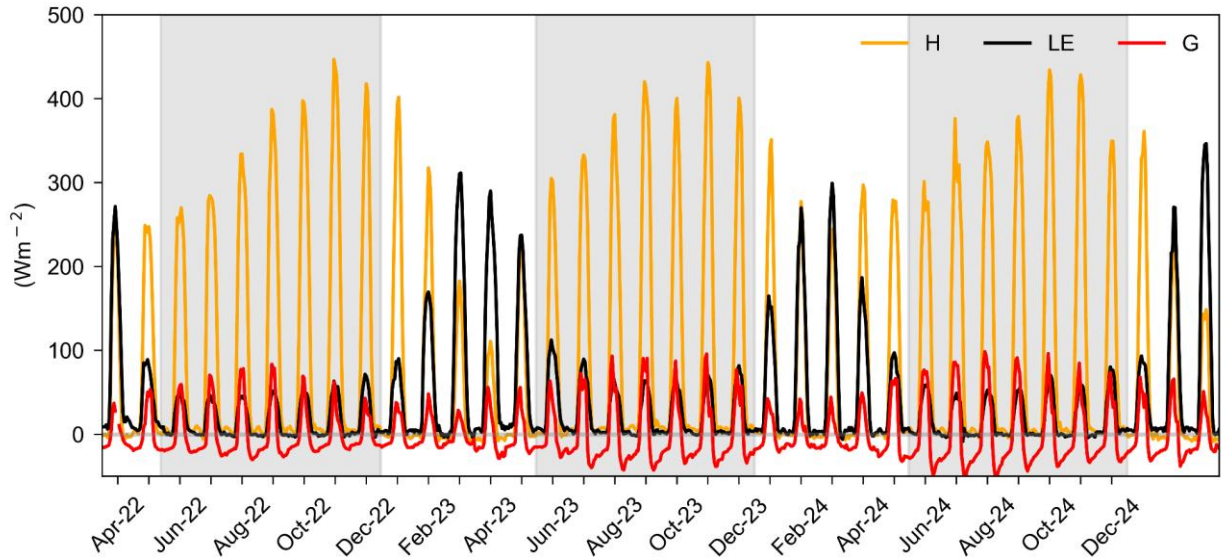

Figure 1: Diurnal course of latent heat flux (LE, W m<sup>-2</sup>), sensible heat flux (H, W m<sup>-2</sup>) and ground heat flux (G, W m<sup>-2</sup>) over the study period.

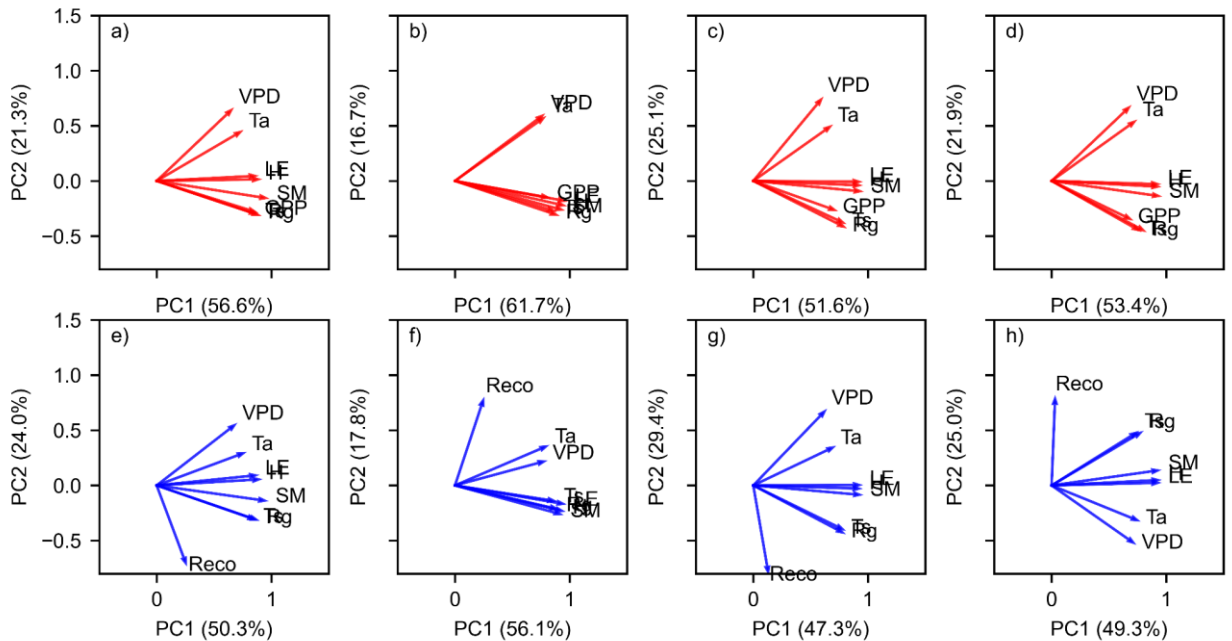

Figure 2: Principal Component Analysis (PCA) of gross primary production (GPP, red) and ecosystem respiration (Reco, blue) in relation to key environmental variables on 30 min data of soil temperature (Ts, °C), air temperature (Ta, °C), vapor pressure deficit

(VPD, hPa), soil moisture (SM, % vol.), latent heat flux (LE,  $W m^{-2}$ ), sensible heat flux (H,  $W m^{-2}$ ), and global radiation ( $R_g$ ,  $W m^{-2}$ ) for the four seasonal conditions: (a, e) wet, (b, f) dry, (c, g) wet-to-dry transition, and (d, h) dry-to-wet transition.
